# Supplementary material
Source: publisher site journal article supplement (https://www.dovepress.com/article/596385)
Supplement: Supplementary file 1 [file 596385_Supplementary_file.docx]

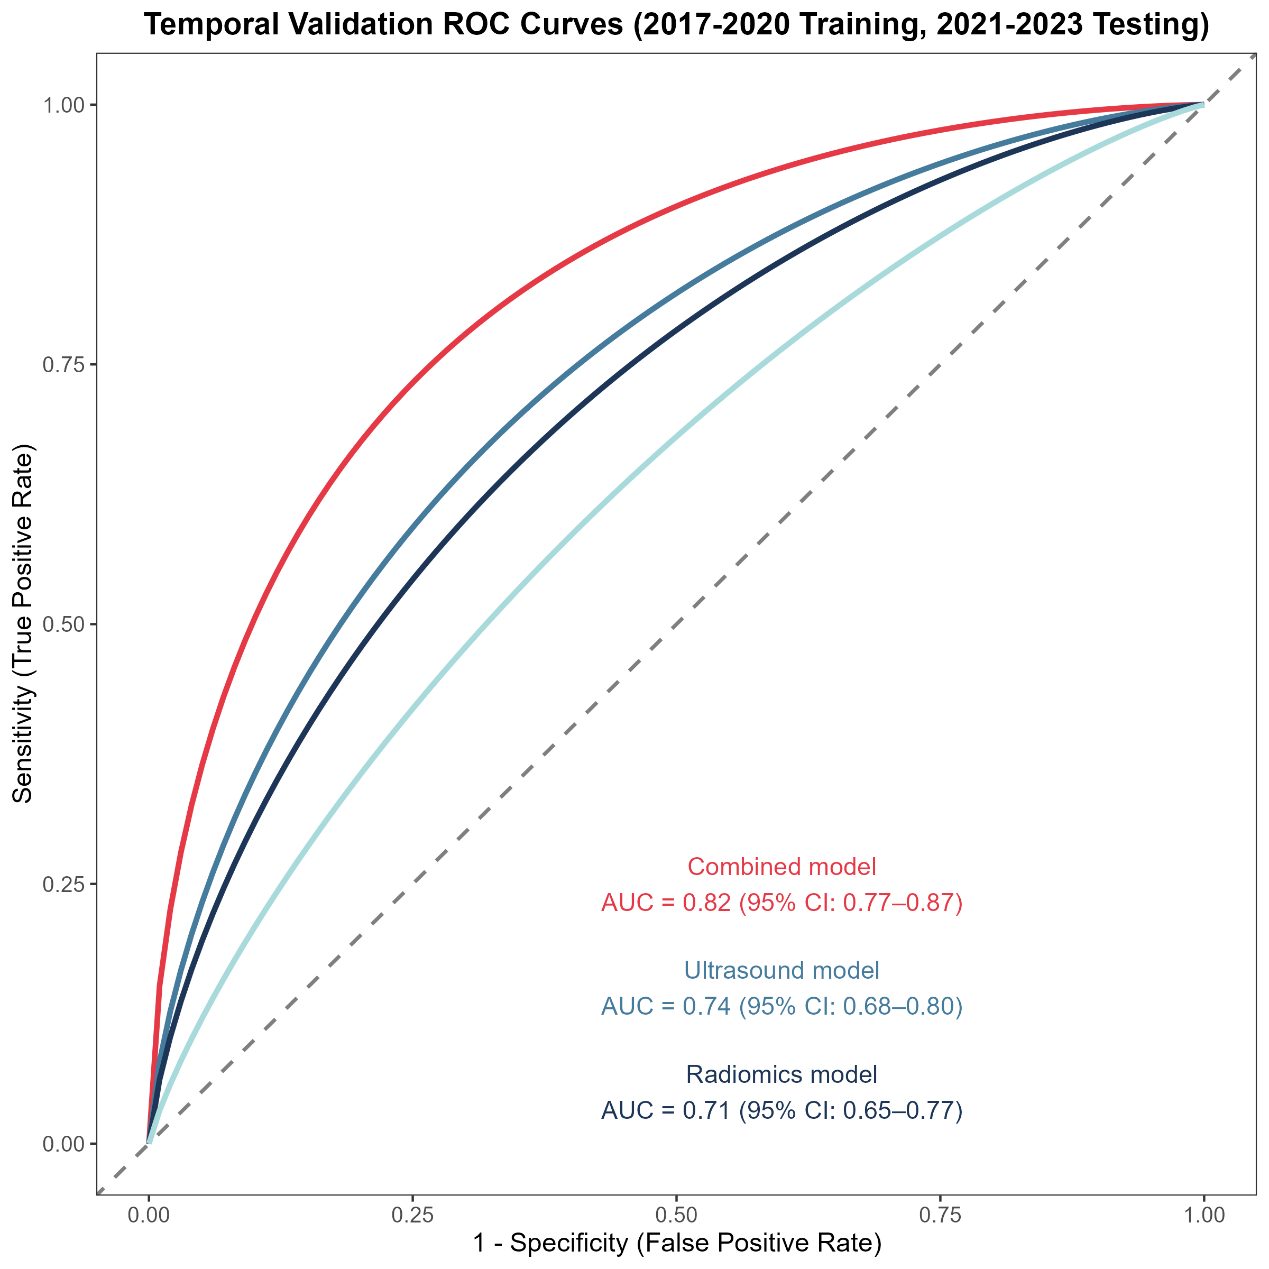


Supplementary Figure 1. Temporal Validation ROC Curves

Caption. The combined model maintained stable diagnostic performance in the external temporal validation cohort, supporting its generalization.

Supplementary Table 1. Logistic Regression Coefficients of the Combined Model

| **Variable** | **Coefficient (β)** | **OR** | **95% CI** | ***P* value** |
| --- | --- | --- | --- | --- |
| Age (per year) | 0.052 | 1.053 | 1.027–1.080 | <0.001 |
| Lesion length (cm) | −0.356 | 0.701 | 0.573–0.857 | 0.001 |
| Microcalcification (yes=1) | 2.1 | 8.197 | 4.895–14.144 | <0.001 |
| Surrounding structure distortion (yes=1) | 1.247 | 3.479 | 2.044–6.044 | <0.001 |
| Blood flow grade (per unit) | 0.178 | 1.195 | 1.036–2.408 | 0.042 |
| Radiomics score (Rad‑score) | 1.324 | 3.758 | 2.612–5.407 | <0.001 |
| Intercept | −2.865 | — | — | <0.001 |

Note. OR, odds ratio; CI, confidence interval.

Supplementary Table 2. Diagnostic Performance of the Combined Model at Clinical Thresholds

| **Threshold (Probability)** | **Sensitivity** | **Specificity** | **PPV** | **NPV** | **Accuracy** |
| --- | --- | --- | --- | --- | --- |
| 0.3 | 0.876 | 0.591 | 0.702 | 0.812 | 0.741 |
| 0.5 | 0.773 | 0.67 | 0.713 | 0.737 | 0.724 |
| 0.7 | 0.619 | 0.818 | 0.789 | 0.66 | 0.708 |

Note. PPV, positive predictive value; NPV, negative predictive value.

Supplementary Table 3. Correction of Misclassified Cases by the Combined Model

| **Model** | **False Negatives (FN)** | **False Positives (FP)** | **Total Misclassified** | **Correction Rate*** |
| --- | --- | --- | --- | --- |
| Clinical + Ultrasound model | 32 | 29 | 61 | — |
| Combined model | 22 | 29 | 51 | **16.40%** |

*Correction rate = (MisclassifiedClinical+Ultrasound − MisclassifiedCombined) / MisclassifiedClinical+Ultrasound × 100%.

# PyRadiomics v3.0.1 Configuration File

# Study: Radiomics Signature for Differentiating Breast Non-Mass Lesions

# Image Modality: Ultrasound (Grayscale 2D)

# ROI Segmentation: Manual annotation using ITK-SNAP 3.8.0

# -------------------------- 1. 重采样参数 (Resampling) --------------------------

# 统一图像像素间距（单位：mm），保证不同设备图像尺寸一致

resampledPixelSpacing: [0.1, 0.1, 1.0] # 2D超声：xy平面0.1mm，z轴1.0mm

interpolator: sitkBSpline3 # 3阶B样条插值（临床放射组学常用）

padDistance: 0 # 无边界填充

correctMask: True # 重采样后校正ROI掩码

# -------------------------- 2. 灰度离散化参数 (Grayscale Discretization) --------------------------

# 灰度值分箱，统一特征提取的灰度尺度

binWidth: 25 # 分箱宽度（核心离散化参数）

binCount: null # 禁用固定分箱数（优先用binWidth）

rescale: True # 灰度值重缩放

rescaleMinMax: [0, 255] # 重缩放至0-255（超声图像标准灰度范围）

# -------------------------- 3. 归一化参数 (Normalization) --------------------------

# 消除图像灰度值分布差异，提升特征稳定性

normalize: True # 启用全局归一化

normalizeScale: 100 # 归一化尺度（缩放到0-100）

normalizeCenter: mean # 以均值为中心归一化

removeOutliers: 3.0 # 移除3σ外的异常值（减少噪声影响）

# -------------------------- 4. 滤波器参数 (Filters) --------------------------

# 多尺度特征提取，覆盖不同纹理尺度

preComputeRadiomicsMask: True

preProcess:

# 高斯滤波器（平滑噪声）

- name: Gaussian

sigma: [0.5, 1.0, 2.0] # 多尺度高斯核

# 小波滤波器（纹理分解）

- name: Wavelet

wavelet: "db4" # 4阶Daubechies小波

levels: [1, 2, 3] # 3级小波分解

# 拉普拉斯高斯滤波器（边缘检测）

- name: LoG

sigma: [0.5, 1.0, 1.5]

# 局部二进制模式（LBP）

- name: LBP2D

radius: 1

nbins: 8

sampling: 1

# -------------------------- 5. 特征提取参数 (Feature Extraction) --------------------------

# 包含所有放射组学特征类别，满足可重复性要求

featureClass:

shape: True # 形状特征（体积、表面积、球形度等）

shape2D: True # 2D专用形状特征（超声图像适配）

firstorder: True # 一阶统计特征（均值、方差、偏度等）

glcm: True # 灰度共生矩阵（纹理特征核心）

gldm: True # 灰度依赖矩阵

glrlm: True # 灰度行程长度矩阵

glszm: True # 灰度大小区域矩阵

ngtdm: True # 邻域灰度差分矩阵

glcmm: True # 多尺度灰度共生矩阵

# -------------------------- 6. 特征筛选参数 (Feature Selection) --------------------------

# 补充特征筛选逻辑，提升结果可复现性

featureSelection:

method: "SelectFromModel"

estimator: "LassoCV"

cvFolds: 5 # 5折交叉验证

threshold: "mean"

pValueThreshold: 0.05 # 统计显著性阈值

correlationThreshold: 0.8 # 去除高相关特征（r>0.8）

# -------------------------- 7. 通用参数 (General Settings) --------------------------

label: 1 # ROI掩码标签值（默认1）

geometryTolerance: 1e-6 # 几何容差

verbose: False # 关闭冗余输出

additionalInfo: True # 保存特征提取附加信息
